# Supplementary material
Source: PubMed Central journal article supplement (PMC5407054)
Supplement: jix053_suppl_Supplemental_Figure_S1.pdf [file jix053_suppl_Supplemental_Figure_S1.pdf]

**A**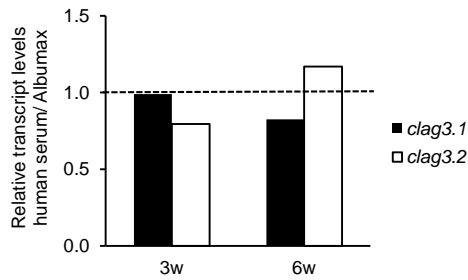**B**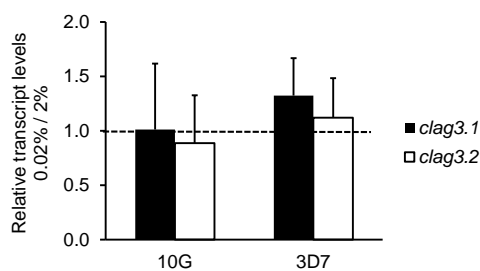

**Supplemental Fig. S1. Validation of the methods used.** (A) Expression of *clag3.1* and *clag3.2* in the P04 isolate maintained in culture media supplemented with human serum relative to expression in media supplemented with Albumax II. Cultures were maintained under the different conditions for up to 6 weeks. (B) Validation of the RT-qPCR protocols for the analysis of samples with low parasite densities. We compared *clag3* expression in the 10G and 3D7-ITM parasite lines (expressing predominantly *clag3.2* and *clag3.1*, respectively) between 2% and 0.02% parasitaemia. Results are expressed as the transcript levels (normalized against *rhoph2*) at 0.02% parasitaemia relative to transcript levels at 2% parasitaemia. Values are the average of three independent experiments, with SD.
