# Supplementary material
Source: PubMed Central journal article supplement (PMC5407054)
Supplement: jix053_suppl_Supplemental_Figure_S4.pdf [file jix053_suppl_Supplemental_Figure_S4.pdf]

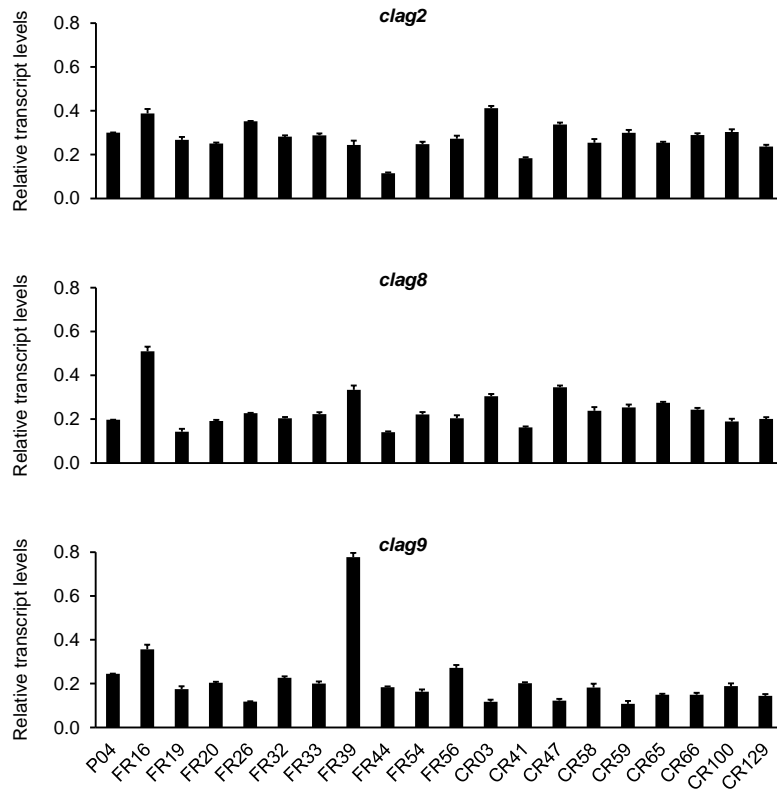

**Supplemental Fig. S4. Expression of *clag2*, *clag8* and *clag9* in *P. falciparum* natural infections.** RNA from field isolates cultured *ex vivo* to the schizont stage was used for this analysis, as in Fig. 1B. Transcript levels are normalized against *rhoph2*. Error bars are SD. Only isolate FR39 presented substantially higher expression of *clag9* than other isolates. Analysis of FR39 genomic DNA by qPCR ruled out altered *clag9* copy number in this isolate (data not shown).
