# Supplementary material
Source: PubMed Central journal article supplement (PMC5407054)
Supplement: jix053_suppl_Supplemental_Figure_S5.pdf [file jix053_suppl_Supplemental_Figure_S5.pdf]

**A**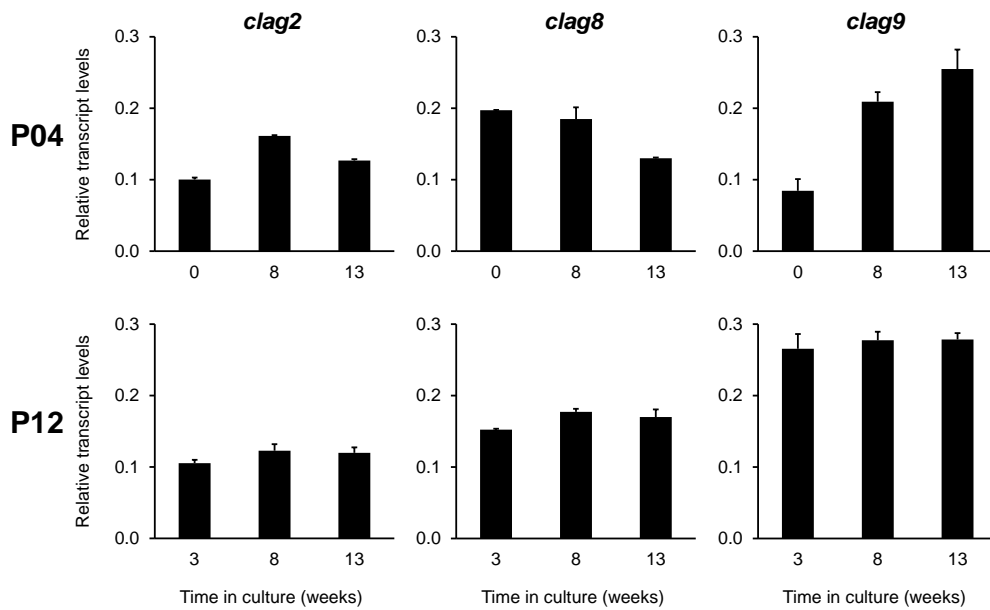**B**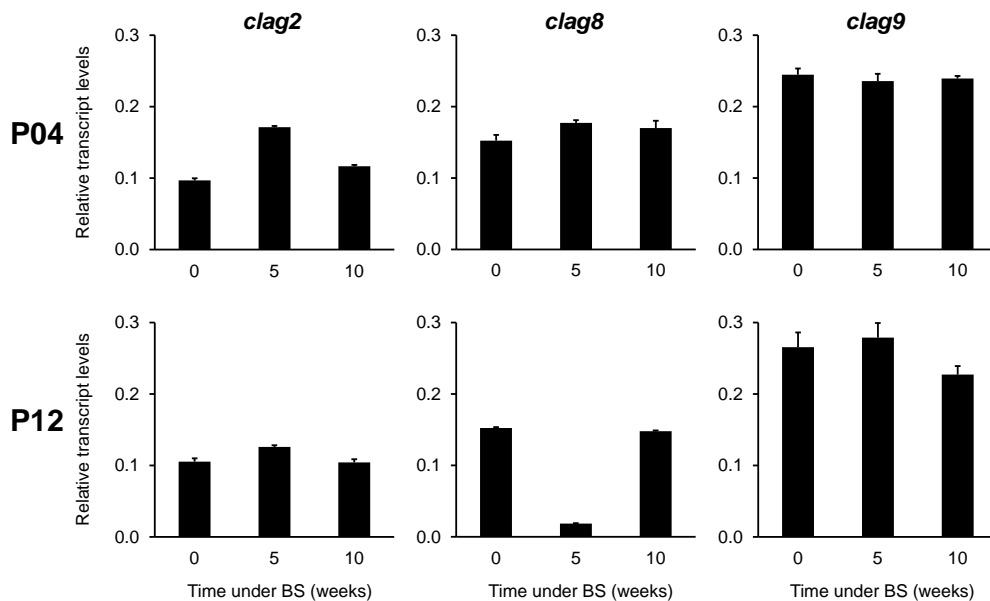

**Supplemental Fig. S5. Expression of *clag2*, *clag8* and *clag9* in field isolates maintained under culture conditions or under drug pressure.** Transcript levels were measured in the P04 and P12 isolates maintained under culture conditions for up to 13 weeks (A) or selected with a low concentration (0.3  $\mu\text{g/mL}$ ) of blasticidin S (BS) for up to 10 weeks (B). Transcript levels are normalized against *rhoph2*. Error bars are SD. Only one of the samples, P12 after 5 weeks of BS pressure, presented a substantially lower expression of *clag8*, but after 10 weeks of selection *clag8* expression was back to normal levels.
