# Supplementary material
Source: PubMed Central journal article supplement (PMC5407054)
Supplement: jix053_suppl_Supplemental_Figure_S6.pdf [file jix053_suppl_Supplemental_Figure_S6.pdf]

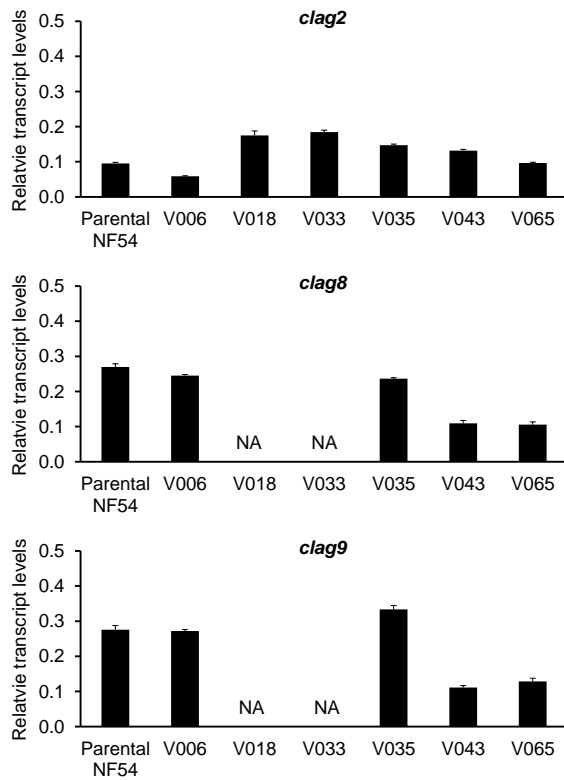

**Supplemental Fig. S6. Expression of *clag2*, *clag8* and *clag9* in parasites collected from *P. falciparum*-infected volunteers at the day of malaria and in cultures of the parental NF54 line used to produce the sporozoites.** Parasites were cultured until parasitaemia was high enough for transcriptional analysis (3-4 cycles). Transcript levels are normalized against *rhoph2*. Error bars are SD. NA: not analyzed.
