# Supplementary material
Source: PubMed Central journal article supplement (PMC5407054)
Supplement: jix053_suppl_Supplemental_Figure_S7.pdf [file jix053_suppl_Supplemental_Figure_S7.pdf]

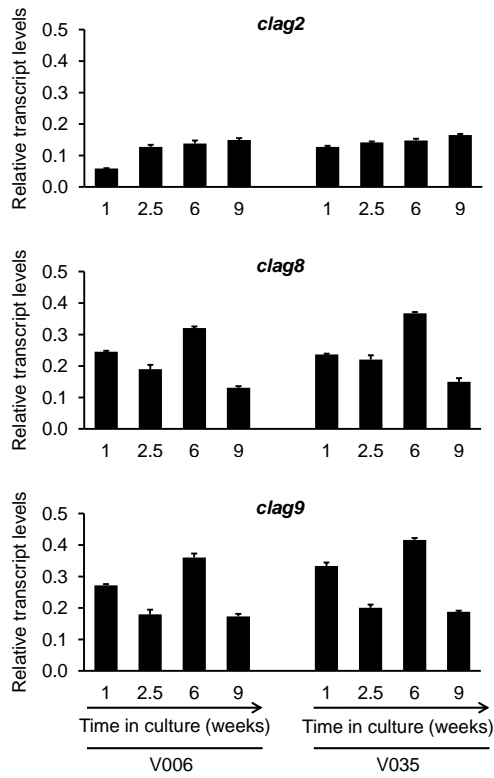

**Supplemental Fig. S7. Expression of *clag2*, *clag8* and *clag9* in parasites collected from two infected human volunteers at the day of malaria and maintained under culture conditions for up to 9 weeks.** Transcript levels are normalized against *rhoph2*. Error bars are SD.
