# Supplementary material
Source: PubMed Central journal article supplement (PMC5407054)
Supplement: jix053_suppl_Supplemental_Figure_S8.pdf [file jix053_suppl_Supplemental_Figure_S8.pdf]

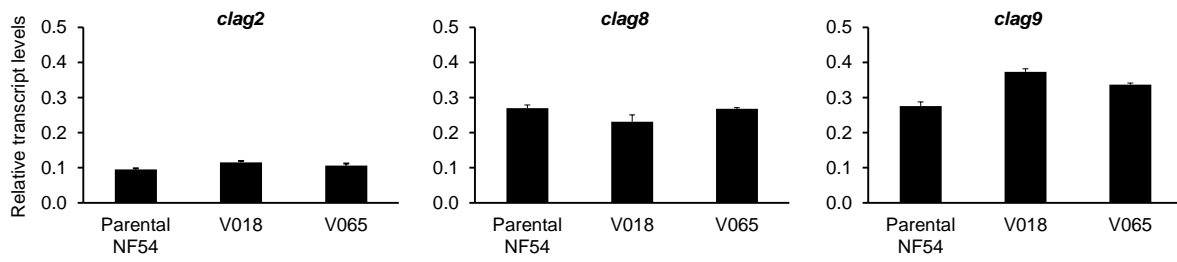

**Supplemental Fig. S8. Expression of *clag2*, *clag8* and *clag9* in parasites collected from infected human volunteers at day 9 and in the parental NF54 line.** Parasites were cultured until parasitaemia was high enough for transcriptional analysis (2-3 weeks). Transcript levels are normalized against *rhop2*. Error bars are SD.
