# Supplementary material
Source: PubMed Central journal article supplement (PMC5407054)
Supplement: jix053_suppl_Supplemental_Table_S1.pdf [file jix053_suppl_Supplemental_Table_S1.pdf]

## Supplemental Table S1. Primers used in this study.

| Name                  | Sequence 5'--3'               | Target gene                     | Samples                       |
|-----------------------|-------------------------------|---------------------------------|-------------------------------|
| <b>long PCR</b>       |                               |                                 |                               |
| clag3.1_long_F*       | TGTGCAATATATCAAAGTGACATGC     | <i>clag3.1</i>                  | All                           |
| clag3.1_long_R*       | TAGAAAATATTAGAATTGCTATTATGTAC | <i>clag3.1</i>                  | All                           |
| clag3.2_long_F*       | AATAGTTGAGTACGCACTAATATGTC    | <i>clag3.2</i>                  | All                           |
| clag3.2_long_R*       | ACACAAATTCTTAATAATTATATAAAACC | <i>clag3.2</i>                  | All                           |
| <b>HVR Sequencing</b> |                               |                                 |                               |
| seq3.1&3.2B F         | ATCAGGCTGTGGCAAGTGC           | <i>clag3.1</i> & <i>clag3.2</i> | Field isolates                |
| seq3.1&3.2B R         | CTGACGGTTTGCCTTCGTAGG         | <i>clag3.1</i> & <i>clag3.2</i> | Field isolates                |
| <b>RT-qPCR</b>        |                               |                                 |                               |
| PF07_0073 F*          | AAGTAGCAGGTCATCGTGGTT         | <i>seryl</i>                    | All                           |
| PF07_0073 R*          | TTCGGCACATTCTCCATAA           | <i>seryl</i>                    | All                           |
| rhopH2_qRT_P2F*       | TGTTGCTGTCCATATTTAGTTTT       | <i>rhopH2</i>                   | All                           |
| rhopH2_qRT_P2R*       | AATATATCGCTACATAACTTCGT       | <i>rhopH2</i>                   | All                           |
| clag3.1 clag3.2 – 6F* | TAGTAATGAGAATTAGTTGGACA       | <i>clag3.1</i> & <i>clag3.2</i> | NF54/3D7, some field isolates |
| clag3.1 –6R*          | ATAAATATTTGGATGCTTCAGCA       | <i>clag3.1</i>                  | NF54/3D7, some field isolates |
| clag3.2 –6R*          | ACAATATGTTTTCTGAACTAGGA       | <i>clag3.2</i>                  | NF54/3D7, some field isolates |
| BR054_3.1F            | TCTGCTAAAAAGGTAGGTCAGT        | <i>clag3.1</i>                  | Some field isolates           |
| BR054_3.1R            | GGATTTATATTTACCACTTGCAC       | <i>clag3.1</i>                  | Some field isolates           |
| BR054_3.2R            | CGCACTAGGACAAGTTTTCTG         | <i>clag3.2</i>                  | Some field isolates           |
| CRYO947_3.2F          | ACACATGCTTTTACAACCTGGAC       | <i>clag3.2</i>                  | Some field isolates           |
| CRYO1000_3.1R         | GCTTTTATAGAATTAGTATTAGCG      | <i>clag3.1</i>                  | Some field isolates           |
| CRYO1000_3.2R         | TTACAATTAGTAGTAGAACTTGAG      | <i>clag3.2</i>                  | Some field isolates           |
| CRYO1029_3.1R         | CTTTTATAGAATTAGTATTAGCGG      | <i>clag3.1</i>                  | Some field isolates           |
| CRYO1029_3.2R         | ACAATTAGTAGTAGAACTTGAGG       | <i>clag3.2</i>                  | Some field isolates           |
| CRYO1029_3.1&3.2F     | TATCAGGCTGTGGCAAGTGC          | <i>clag3.1</i> & <i>clag3.2</i> | Some field isolates           |
| BR044 & BR026_3.1F    | GATCCCAAAAGTTGTACTAGTAG       | <i>clag3.1</i>                  | Some field isolates           |
| BR044 & BR026_3.1R    | CAGCAAGTGCCTGAGTGAAG          | <i>clag3.1</i>                  | Some field isolates           |
| BR044 & BR026_3.2F    | CCTCAAGTTCTACTACTAATTGT       | <i>clag3.2</i>                  | Some field isolates           |
| BR044 & BR026_3.2R    | CAGCAAGTCCGTGAGTAAAGA         | <i>clag3.2</i>                  | Some field isolates           |
| clag9_qRT_F2          | AATCACTTACCTGAAGAATTGAG       | <i>clag9</i>                    | Field isolates, Selection     |
| clag9_qRT_R2          | ACGAAAGGGACAAACCATGAC         | <i>clag9</i>                    | Field isolates, Selection     |
| clag9_qRT_F1*         | GTAATCAATGGCAAATCTTGG         | <i>clag9</i>                    | CHMI                          |
| clag9_qRT_R1*         | CTGGTTGTTGTAATTCTACACC        | <i>clag9</i>                    | CHMI                          |
| clag8_qRT_F2          | ACGGAAGATACGGATTTTCGAC        | <i>clag8</i>                    | Field isolates, Selection     |
| clag8_qRT_R2          | TCGAAAGTATCTTCTCATCCT         | <i>clag8</i>                    | Field isolates, Selection     |
| clag8_qRT_F1*         | CATCGGTTTCATGGTTTTACACA       | <i>clag8</i>                    | CHMI                          |
| clag8_qRT_R1*         | AAGCATATATTTGTGAAAGGCTC       | <i>clag8</i>                    | CHMI                          |
| clag2_qRT_F3          | GTCATAAGGAAGAAACCAACAC        | <i>clag2</i>                    | Field isolates                |
| clag2_qRT_R3          | TGTTTGAATATAGAAATGCCCT        | <i>clag2</i>                    | Field isolates                |
| clag2_qRT_F1*         | TTCGTGCATCATATGGTTGGG         | <i>clag2</i>                    | CHMI                          |
| clag2_qRT_R1&2*       | TATATAGGTGCATCAGATTTCCA       | <i>clag2</i>                    | CHMI, Selection               |
| clag2_qRT_F2          | ATCTATCTCTCAGAATTCGTGC        | <i>clag2</i>                    | Selection                     |
| <b>Others</b>         |                               |                                 |                               |
| clag9_long_F1         | GATTCCAATAATGAAAGGTGATCTTG    | <i>clag9</i>                    | Field isolates                |
| clag9_long_R1         | TCATAACGTTTCGTTCTATCTATACC    | <i>clag9</i>                    | Field isolates                |
| clag2_seqF1           | GTCTTTTGTGTGAATACCAAGC        | <i>clag2</i>                    | Field isolates                |
| clag2_seqR1           | ATGAAGTAGAAAATCCTCCAGG        | <i>clag2</i>                    | Field isolates                |
| clag9_seqF1           | AATATCAAGCCATTGGAAGTGC        | <i>clag9</i>                    | Field isolates                |
| clag9_seqR1           | TTGCCAATCAACTACTGAACAG        | <i>clag9</i>                    | Field isolates                |
| seqR3.2_BR044 & BR026 | TGACGGTTTGCCTTCATACGT         | <i>clag3.2</i>                  | Some field isolates           |
| seqC_R                | ATACTTAAATAAGCCTCACGTTCC      | <i>clag3.1</i> & <i>clag3.2</i> | Some field isolates           |

The primers marked with an asterisk have been previously described [1-3]. “Selection” refers to the samples from the selection experiments shown in Figs. 2 and S4. Primers for *clag3* genes were used to analyze *clag3.1* expression in some isolates and to analyze *clag3.2* expression in other isolates. The name of the primer only indicates the isolate and the paralog against which the primer was originally designed. “Others” corresponds to primers used to obtain sequences for the genes indicated to confirm the absence of polymorphism in the regions where the primers for transcriptional analysis were designed.

## References.

1. Iriko H, Kaneko O, Otsuki H, et al. Diversity and evolution of the *rhopH1/clag* multigene family of *Plasmodium falciparum*. *Mol Biochem Parasitol* **2008**; 158:11-21.
2. Crowley VM, Rovira-Graells N, de Pouplana LR, Cortés A. Heterochromatin formation in bistable chromatin domains controls the epigenetic repression of clonally variant *Plasmodium falciparum* genes linked to erythrocyte invasion. *Mol Microbiol* **2011**; 80:391-406.
3. Mira-Martínez S, Rovira-Graells N, Crowley VM, Altenhofen LM, Llinás M, Cortés A. Epigenetic switches in *clag3* genes mediate blasticidin S resistance in malaria parasites. *Cell Microbiol* **2013**; 15:1913-23.
